# Supplementary material for: Gendered relationship between HIV stigma and HIV testing among men and women in Mozambique: a cross-sectional study to inform a stigma reduction and male-targeted HIV testing intervention
Source: PubMed Central journal article supplement — BMJ Open. 2019 Oct 7;9(10):e029748. doi: 10.1136/bmjopen-2019-029748 (PMC6797434; doi:10.1136/bmjopen-2019-029748), 2019-10-07
Supplement: bmjopen-2019-029748supp001.pdf [file bmjopen-2019-029748supp001.pdf]

**THE GENDERED RELATIONSHIP BETWEEN HIV STIGMA AND HIV TESTING AMONG MEN AND WOMEN  
IN MOZAMBIQUE: A CROSS-SECTIONAL STUDY TO INFORM A STIGMA REDUCTION AND MALE-  
TARGETED HIV TESTING INTERVENTION**

Judy H. Ha<sup>1</sup>, Lynn Van Lith<sup>2</sup>, Elizabeth C. Mallalieu<sup>2</sup>, Jose Chidassica<sup>3</sup>, Dirce Pinho<sup>3</sup>, Patrick Devos<sup>3</sup>,  
Andrea L. Wirtz<sup>4\*</sup>

**Appendix: Stigma survey measures**

|                                                                                                                                  |
|----------------------------------------------------------------------------------------------------------------------------------|
| <b>Genberg Stigma Scale: Shame/blame/isolation subscale (measured as 4 point Likert scale of level of agreement)<sup>1</sup></b> |
| People living with HIV/AIDS should be ashamed                                                                                    |
| People with AIDS should be isolated from other people.                                                                           |
| People who have HIV/AIDS are cursed                                                                                              |
| A person with HIV/AIDS should be allowed to work with other people <sup>+</sup>                                                  |
| People living with HIV/AIDS deserved to be punished                                                                              |
| Families of people living with HIV/AIDS should be ashamed                                                                        |
| It is reasonable for an employer to fire people who have HIV/AIDS                                                                |
| People living with HIV/AIDS are disgusting                                                                                       |
| People who have HIV/AIDS deserve compassion <sup>+</sup>                                                                         |
| People with HIV should be allowed to participate fully in the social events in this community <sup>+</sup>                       |
| <b>Genberg Stigma Scale: Discrimination subscale (measured as 4 point Likert scale of level of agreement)<sup>1</sup></b>        |
| People living with HIV/AIDS face neglect from their families                                                                     |
| People living with HIV/AIDS face physical abuse                                                                                  |
| People want to be friends with someone who has HIV/AIDS <sup>+</sup>                                                             |
| People living with HIV/AIDS face ejection from their homes by their families                                                     |
| Most people would not buy vegetables from a shopkeeper or food seller that they knew had AIDS                                    |
| People who are suspected of having HIV/AIDS lose respect in the community                                                        |
| People who have HIV/AIDS face verbal abuse                                                                                       |
| People living with HIV/AIDS face rejection from their peers                                                                      |
| <b>Genberg Stigma Scale: Equality subscale (measured as 4 point Likert scale of level of agreement)<sup>1</sup></b>              |
| People who have HIV/AIDS should be treated the same as everyone else <sup>+</sup>                                                |
| People with HIV/AIDS do not deserve any support                                                                                  |
| People with HIV/AIDS should not have the same freedoms as other people                                                           |
| People living with HIV/AIDS should be treated similarly by healthcare professionals as people with other illnesses <sup>+</sup>  |
| <b>DHS AIDS Indicator Stigma Measures: Anticipated individual stigma (measured as a binary yes/no item)<sup>2</sup></b>          |
| Would you buy fresh vegetables from a shopkeeper or vendor if you knew that this person had HIV/AIDS?                            |
| If a member of your family got infected with HIV/AIDS, would you want it to remain a secret or not?                              |

|                                                                                                                                                                       |
|-----------------------------------------------------------------------------------------------------------------------------------------------------------------------|
| <b>[Continued from above] DHS AIDS Indicator Stigma Measures: Anticipated individual stigma (measured as a binary yes/no item)<sup>2</sup></b>                        |
| If a member of your family became sick with HIV/AIDS, would you be willing to care for him/her in your own household?                                                 |
| If a teacher at the school where you send your students had HIV/AIDS, would you continue to send your children there?                                                 |
| If you found out that one of your friends was living with HIV, would you still be friends with him/her?                                                               |
| <b>New Community Stigma Measures (measured as 4 point Likert scale of level of agreement)</b>                                                                         |
| In this community, men who are known to be living with HIV are treated with respect. <sup>+</sup>                                                                     |
| In this community, men who are known to be living with HIV have the same level of importance in society as men who are not living with HIV. <sup>+</sup>              |
| In this community, women who are known to be living with HIV are treated with respect. <sup>+</sup>                                                                   |
| In this community, women who are known to be living with HIV are considered equally valuable members of the family as those who are not living with HIV. <sup>+</sup> |
| In this community, people who are not living with HIV give support to those who are living with HIV infection. <sup>+</sup>                                           |
| In this community, community members - including people living with and without HIV infection – work together to address the HIV epidemic. <sup>+</sup>               |
| In this community, there are laws and policy to protect people who are living with HIV from discrimination. <sup>+</sup>                                              |

Note: <sup>+</sup> Indicates items that are reverse coded for scoring

#### References:

- 1 B. L. Genberg, S. Kawichai, A. Chingono, M. Sendah, S. Chariyalertsak, K. A. Konda, and D. D. Celentano, 'Assessing Hiv/Aids Stigma and Discrimination in Developing Countries', *AIDS Behav*, 12 (2008), 772-80.
- 2 201 The Demographic Health Surveys (DHS) Program, 'Aids Indicator Survey (Ais)' <<https://dhsprogram.com/What-We-Do/Survey-Types/AIS.cfm> > [Accessed 16 Mar 2018].
